# Supplementary material for: Selenium substituted axitinib reduces axitinib side effects and maintains its anti-renal tumor activity
Source: Royal Society of Chemistry journal article supplement (doi:10.1039/d2ra01882a), 2022-01-01
Supplement: d2ra01882a1.pdf [file d2ra01882a1.pdf]

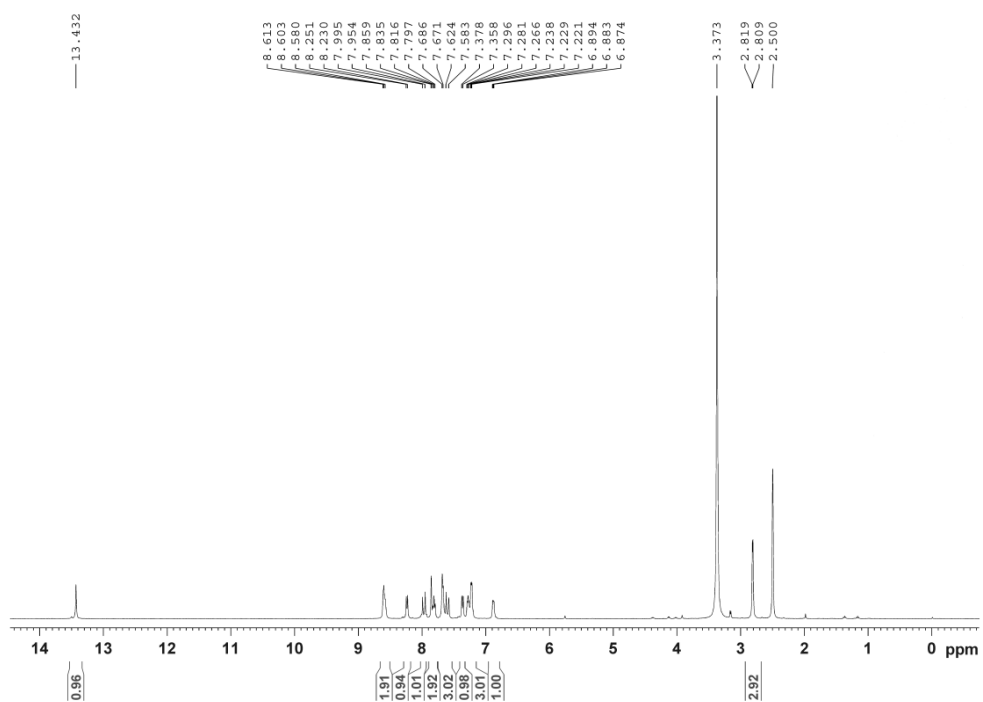

Supplementary Figure.1 <sup>1</sup>H NMR spectrum of Se-axitinib

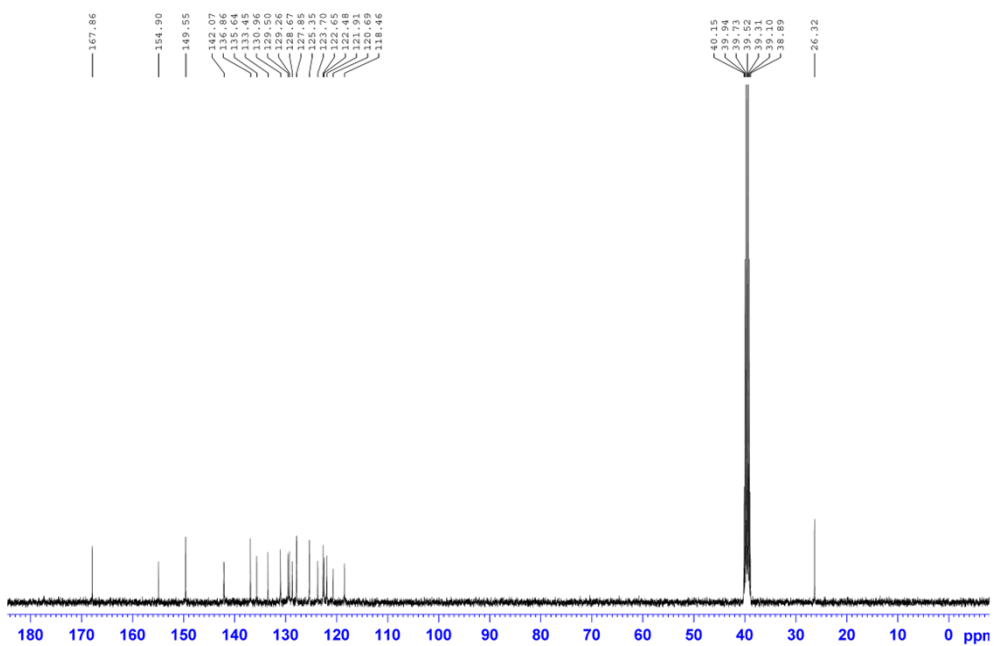

Supplementary Figure.2 <sup>13</sup>C NMR spectrum of Se-axitinib

**Supplementary Table.1** Effects of different dose of axitinib and Se-axitinib on the growth of

xenograft tumor

|                                    | Model | Axitinib<br>(30 mg/kg) | Axitinib<br>(60 mg/kg) | Se-Axitinib<br>(30 mg/kg) | Se-Axitinib<br>(60 mg/kg) |
|------------------------------------|-------|------------------------|------------------------|---------------------------|---------------------------|
| Tumor volume<br>(mm <sup>3</sup> ) | 527.2 | 356.7                  | 310.2                  | 389.8                     | 324.3                     |
| TGI (%)                            | 0.00  | 32.35                  | 41.15                  | 26.06                     | 38.49                     |
